# Supplementary figures and images for: Dual recycling signal amplification strategy based on autocatalytic entropy-driven circuit and DNAzyme for colorimetric detection of platelet-derived growth factor-BB
Source: Royal Society of Chemistry journal article supplement (doi:10.1039/d4ay02128b), 2025-01-01

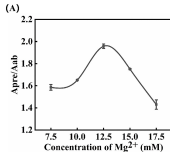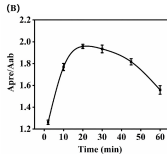

Supplement: d4ay02128b2.pdf [file d4ay02128b2.pdf]

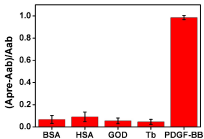

Supplement: d4ay02128b3.pdf [file d4ay02128b3.pdf]
